# Supplementary material for: A Zn(II)-Organic Framework as a Fluorescent Probe for the Aqueous Phase Detection of Nitroaromatic Explosive and Cr(III) ion
Source: Research Square preprint supplement (doi:10.21203/rs.3.rs-934804/v1), 2021-09-29
Supplement: Supplementary file 1 [file 40ab8e33dcc6a4c618b3462b.docx]

**GRAPHICAL ABSTRACT**

A fluorescent MOF **Zn-MOF-1** is synthesized, characterized and employed for detection of Cr3+ TNP in aqueous media.

**
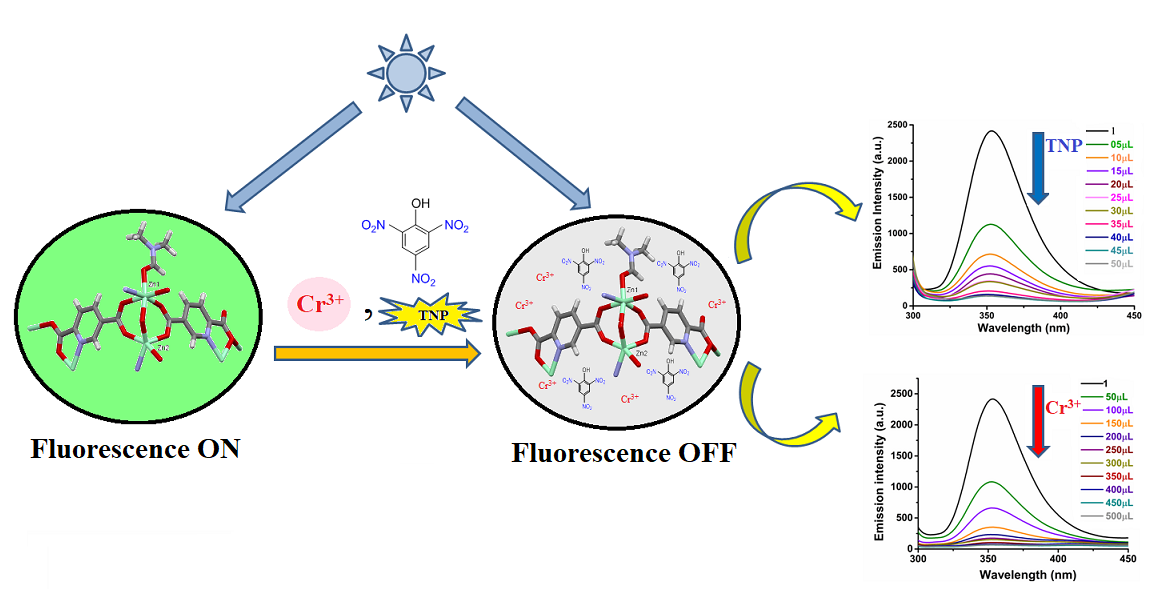
**
